# Supplementary material
Source: publisher figshare collection journal article supplement (https://acs.figshare.com/ndownloader/files/4325926)
Supplement: Supplementary file 1 [file 4325926]

### Supporting Information S3

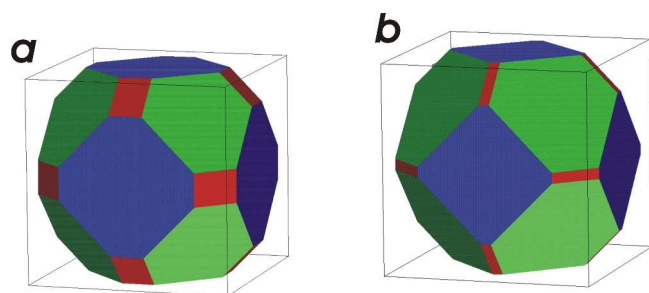

Figure S3: Wulff shapes of dry (a) and partially hydroxylated (b)  $\text{Co}_3\text{O}_4$  (exposed planes are colored as: blue – (100), red – (110), green – (111)); for other shapes see our paper entitled “Periodic DFT and Atomistic Thermodynamic Studies of Cobalt Spinel Nanocrystals in Wet Environment – Molecular Interpretation of Water Adsorption Equilibria”; recently published in *J. Phys. Chem. C* **2010**, *114*, 22245.
